# Supplementary material for: Dermal Regeneration Template in the Management and Reconstruction of Burn Injuries and Complex Wounds: A Review
Source: PubMed Central journal article supplement — Plast Reconstr Surg Glob Open. 2024 Mar 20;12(3):e5674. doi: 10.1097/GOX.0000000000005674 (PMC10954069; doi:10.1097/gox.0000000000005674), 2024-03-20
Supplement: gox-12-e5674-s001.pdf [file gox-12-e5674-s001.pdf]

**SDC 1. Summary of RCTs Evaluating DRT**

| <b>Study</b>                | <b>Patients</b>                                                                           | <b>Treatments</b>                                                              | <b>Outcomes</b>                                                                                                                                                                                                                                                                                                                                                                                                                      |
|-----------------------------|-------------------------------------------------------------------------------------------|--------------------------------------------------------------------------------|--------------------------------------------------------------------------------------------------------------------------------------------------------------------------------------------------------------------------------------------------------------------------------------------------------------------------------------------------------------------------------------------------------------------------------------|
| <b>Burns</b>                |                                                                                           |                                                                                |                                                                                                                                                                                                                                                                                                                                                                                                                                      |
| Heimbach 1988 <sup>12</sup> | Children/adults with life-threatening burns not expected to heal within 3 weeks (N = 106) | DRT versus SOC covering                                                        | DRT improved outcomes vs SOC: <ul style="list-style-type: none"> <li>• ↓ donor site thickness (<math>p &lt; 0.001</math>)</li> <li>• Faster healing donor site (<math>p &lt; 0.001</math>)</li> </ul> SOC associated with ↑ take ( $p < 0.0001$ )                                                                                                                                                                                    |
| Branski 2007 <sup>20</sup>  | Pediatric; burn size $\geq 50\%$ TBSA; $\geq 40\%$ TBSA full-thickness burn (N = 20)      | DRT versus autograft/allograft SG                                              | DRT improved short-term outcomes vs SG: <ul style="list-style-type: none"> <li>• ↓ resting energy expenditure (<math>p &lt; 0.01</math>)</li> <li>• ↑ serum constitutive proteins (<math>p &lt; 0.03</math>)</li> </ul> DRT improved long-term outcomes vs SG: <ul style="list-style-type: none"> <li>• ↑ bone mineral content/density (<math>p &lt; 0.05</math>)</li> <li>• Improved scarring (<math>p &lt; 0.01</math>)</li> </ul> |
| Lagus 2013 <sup>65</sup>    | Adults, TBSA $> 20\%$ ; third-degree burns requiring fascial excision (N = 10)            | DRT versus cellulose sponge versus STSG (all 3 treatments were applied to each | Similar outcomes in terms of take rate, histological, cosmesis and functional outcomes                                                                                                                                                                                                                                                                                                                                               |

| Study                      | Patients                                                                                                                        | Treatments                     | Outcomes                                                                                                                                                                                                                                                                                                                                                                                                                                                                                          |
|----------------------------|---------------------------------------------------------------------------------------------------------------------------------|--------------------------------|---------------------------------------------------------------------------------------------------------------------------------------------------------------------------------------------------------------------------------------------------------------------------------------------------------------------------------------------------------------------------------------------------------------------------------------------------------------------------------------------------|
|                            |                                                                                                                                 | patient in 3 adjacent areas)   |                                                                                                                                                                                                                                                                                                                                                                                                                                                                                                   |
| Vana 2020 <sup>16</sup>    | Age 13-65 years with limited mobility due to sequelae of deep partial or full-thickness burns; Vancouver Scar Scale >6 (N = 24) | DRT versus single-layer dermal | Similar outcomes for: <ul style="list-style-type: none"> <li>• Matrix take rate</li> </ul> DRT improved outcomes vs single layer for: <ul style="list-style-type: none"> <li>• Retraction rate</li> <li>• Skin quality</li> <li>• Mobility recovery</li> </ul>                                                                                                                                                                                                                                    |
| <b><i>Limb Salvage</i></b> |                                                                                                                                 |                                |                                                                                                                                                                                                                                                                                                                                                                                                                                                                                                   |
| Driver 2015 <sup>24</sup>  | Age ≥18 years; full-thickness DFU 1-12 cm <sup>2</sup> post-debridement (N = 307)                                               | DRT versus SOC                 | DRT improved outcomes vs SOC: <ul style="list-style-type: none"> <li>• ↑ complete ulcer closure rate (<math>p = 0.001</math>)</li> <li>• ↓ time to ulcer closure (<math>p = 0.001</math>)</li> <li>• ↑ rate of reduction of wound size (<math>p = 0.012</math>)</li> <li>• Improved quality of life SF-36 scores:               <ul style="list-style-type: none"> <li>○ ↑ Physical functioning (<math>p = 0.047</math>)</li> <li>○ ↓ Bodily pain (<math>p = 0.033</math>)</li> </ul> </li> </ul> |
| <b><i>Trauma</i></b>       |                                                                                                                                 |                                |                                                                                                                                                                                                                                                                                                                                                                                                                                                                                                   |

| <b>Study</b>                  | <b>Patients</b>                                                                 | <b>Treatments</b>                        | <b>Outcomes</b>                                                                                                                                                                                                                                                                                     |
|-------------------------------|---------------------------------------------------------------------------------|------------------------------------------|-----------------------------------------------------------------------------------------------------------------------------------------------------------------------------------------------------------------------------------------------------------------------------------------------------|
| De Angelis 2018 <sup>33</sup> | Post-traumatic wound on inferior limbs without tendon or bone exposure (N = 30) | DRT versus BLM                           | No difference between groups for: <ul style="list-style-type: none"> <li>• Healing time; pain-related VAS scores; patient self-estimation at complete healing; short-term scar score; re-epithelialization</li> </ul> BLM significantly improved total scar score vs DRT at 3 years ( $p = 0.001$ ) |
| <i>Miscellaneous</i>          |                                                                                 |                                          |                                                                                                                                                                                                                                                                                                     |
| Jeschke 2004 <sup>32</sup>    | Trauma, decollement, neoplasm, burn, wound healing delay (N = 12)               | DRT plus fibrin glue and NPWT versus DRT | DRT in combination with fibrin glue and NPWT improved outcomes vs conventional DRT: <ul style="list-style-type: none"> <li>• ↑ take rate (<math>p &lt; 0.003</math>)</li> <li>• ↓ time to skin transplantation (<math>p &lt; 0.002</math>)</li> </ul>                                               |

DFU = diabetic foot ulcer; DRT = Dermal Regeneration Template; BLM = Bi-Layer Matrix; NPWT = negative-pressure wound therapy; RCT = randomized control trial; SF-36 = 36-item Short Form Survey; SG = skin graft; SOC = standard of care; STSG = split thickness skin graft; TBSA = total body surface area; VAS = Visual Analog Scale.
